# Supplementary material
Source: PubMed Central journal article supplement (PMC7099415)
Supplement: Supp_FigS1.pdf [file Supp_FigS1.pdf]

## Supplementary Data

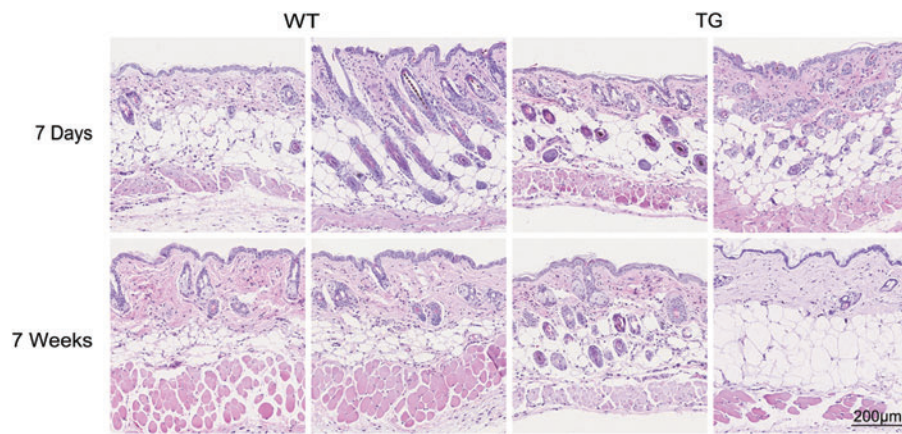

**Supplementary Figure S1.** Dermal skin thickness was reduced and hypodermal adipose tissue was increased in TG mice compared with WT controls.
